# Supplementary material
Source: PubMed Central journal article supplement (PMC6335029)
Supplement: NIHMS997683-supplement-1.pdf [file NIHMS997683-supplement-1.pdf]

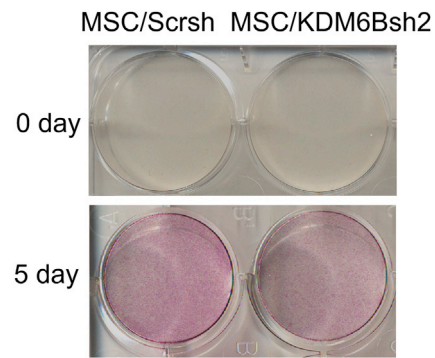

**Figure S2B. KDM6B is required for osteogenic differentiation of MSCs (Related to Figure 2) (corrected)**

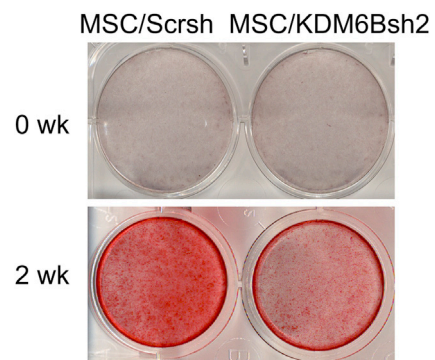

**Figure S2C. KDM6B is required for osteogenic differentiation of MSCs (Related to Figure 2) (corrected)**
